# Supplementary material for: Malaria in Cambodia: A Retrospective Analysis of a Changing Epidemiology 2006–2019
Source: MDPI journal article supplement (doi:10.3390/ijerph18041960), 2021-02-18
Supplement: s1 [file s1]

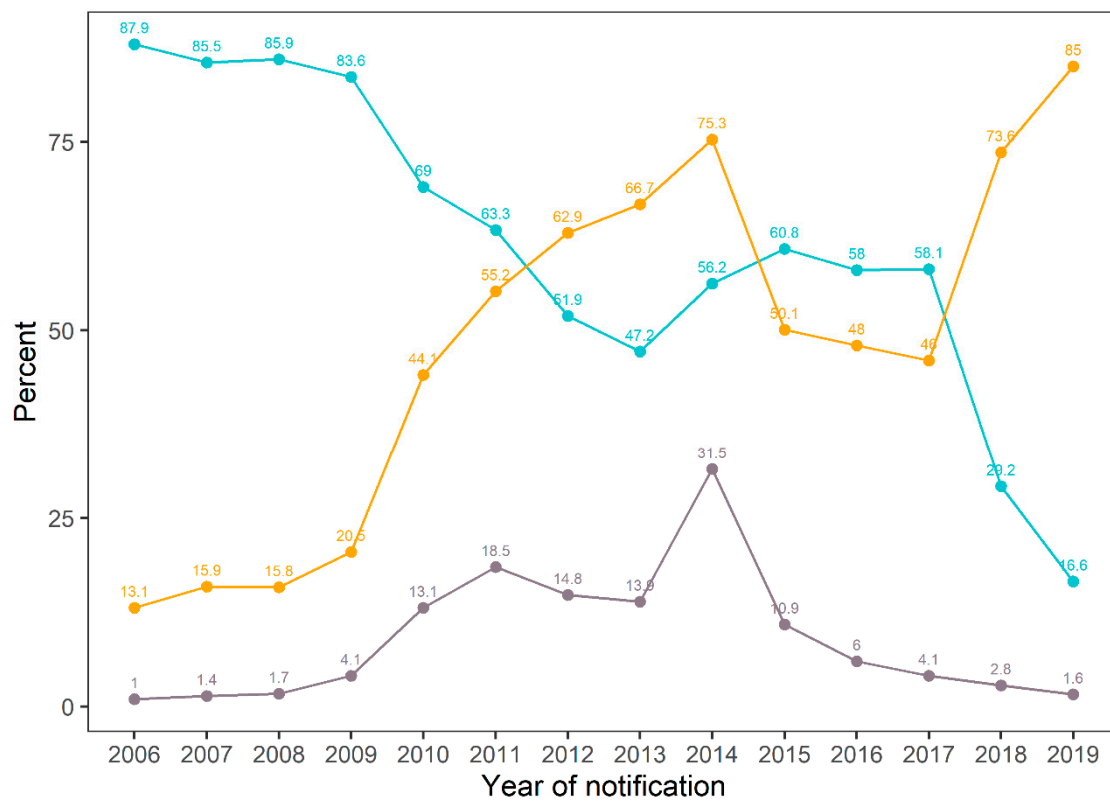

● P. falciparum + Mixed 
 ● Mixed 
 ● P. vivax + Mixed

**Figure S1.** Proportions of malaria confirmed cases by *Plasmodium* species in Cambodia between 2006 and 2019.

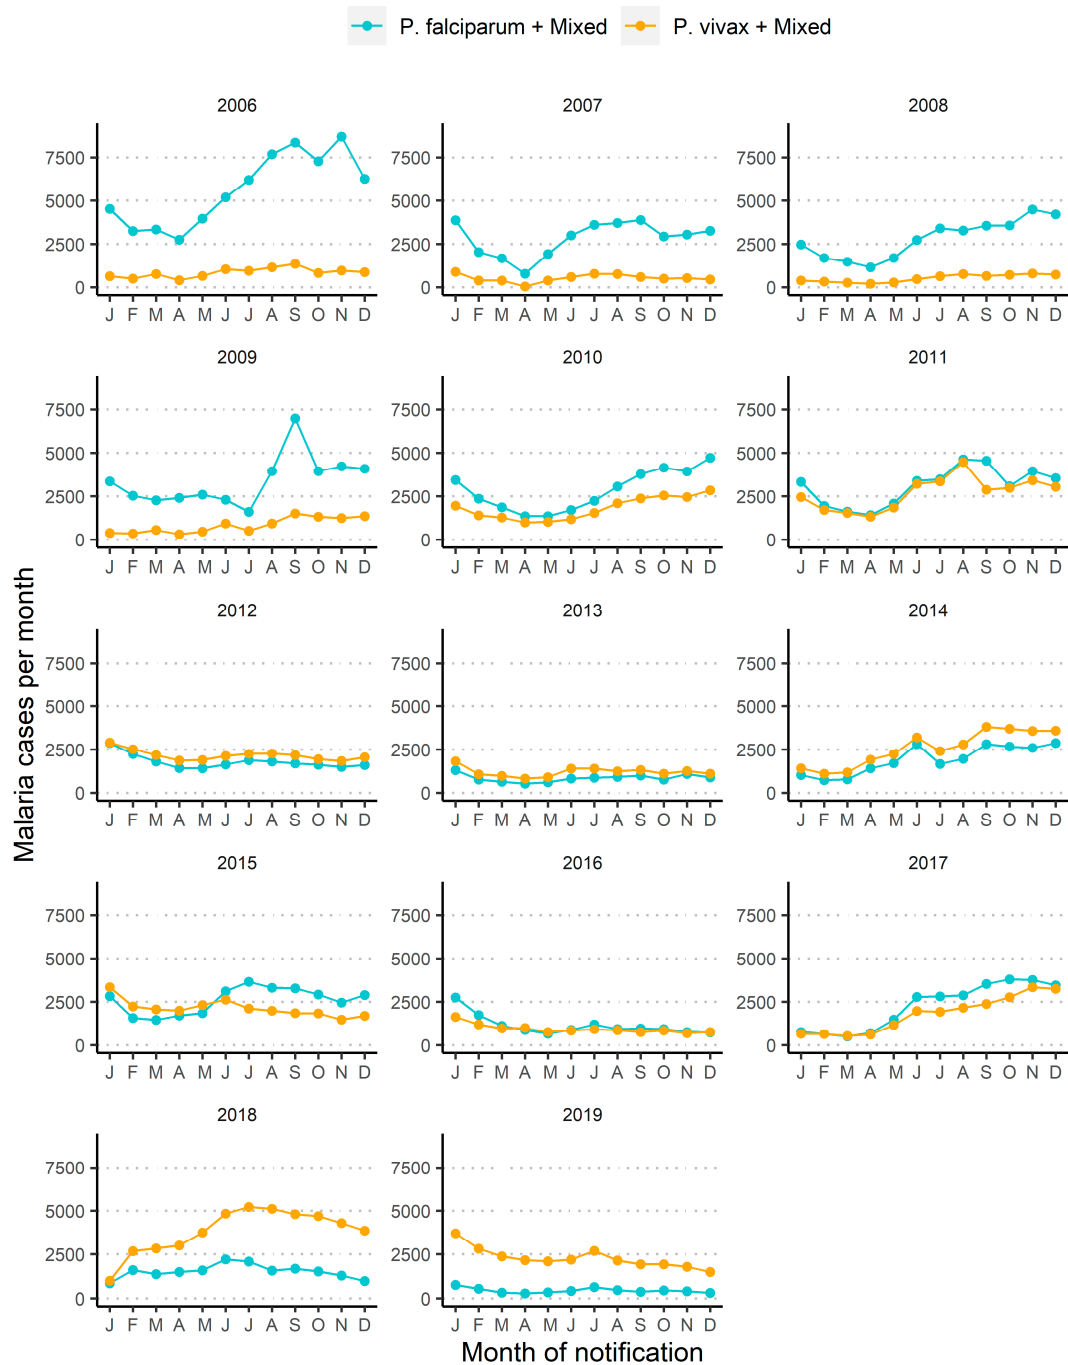

**Figure S2.** Malaria cases (confirmed + unconfirmed) by month (2006–2019), from all government healthcare facilities in Cambodia.
